# Supplementary material for: Can proactive support prevent unscheduled care? A controlled observational retrospective cohort study in cancer patients in Scotland
Source: Springer Nature journal article supplement (doi:10.1186/s12913-024-10923-2), 2024-04-12

# How do we link the data?

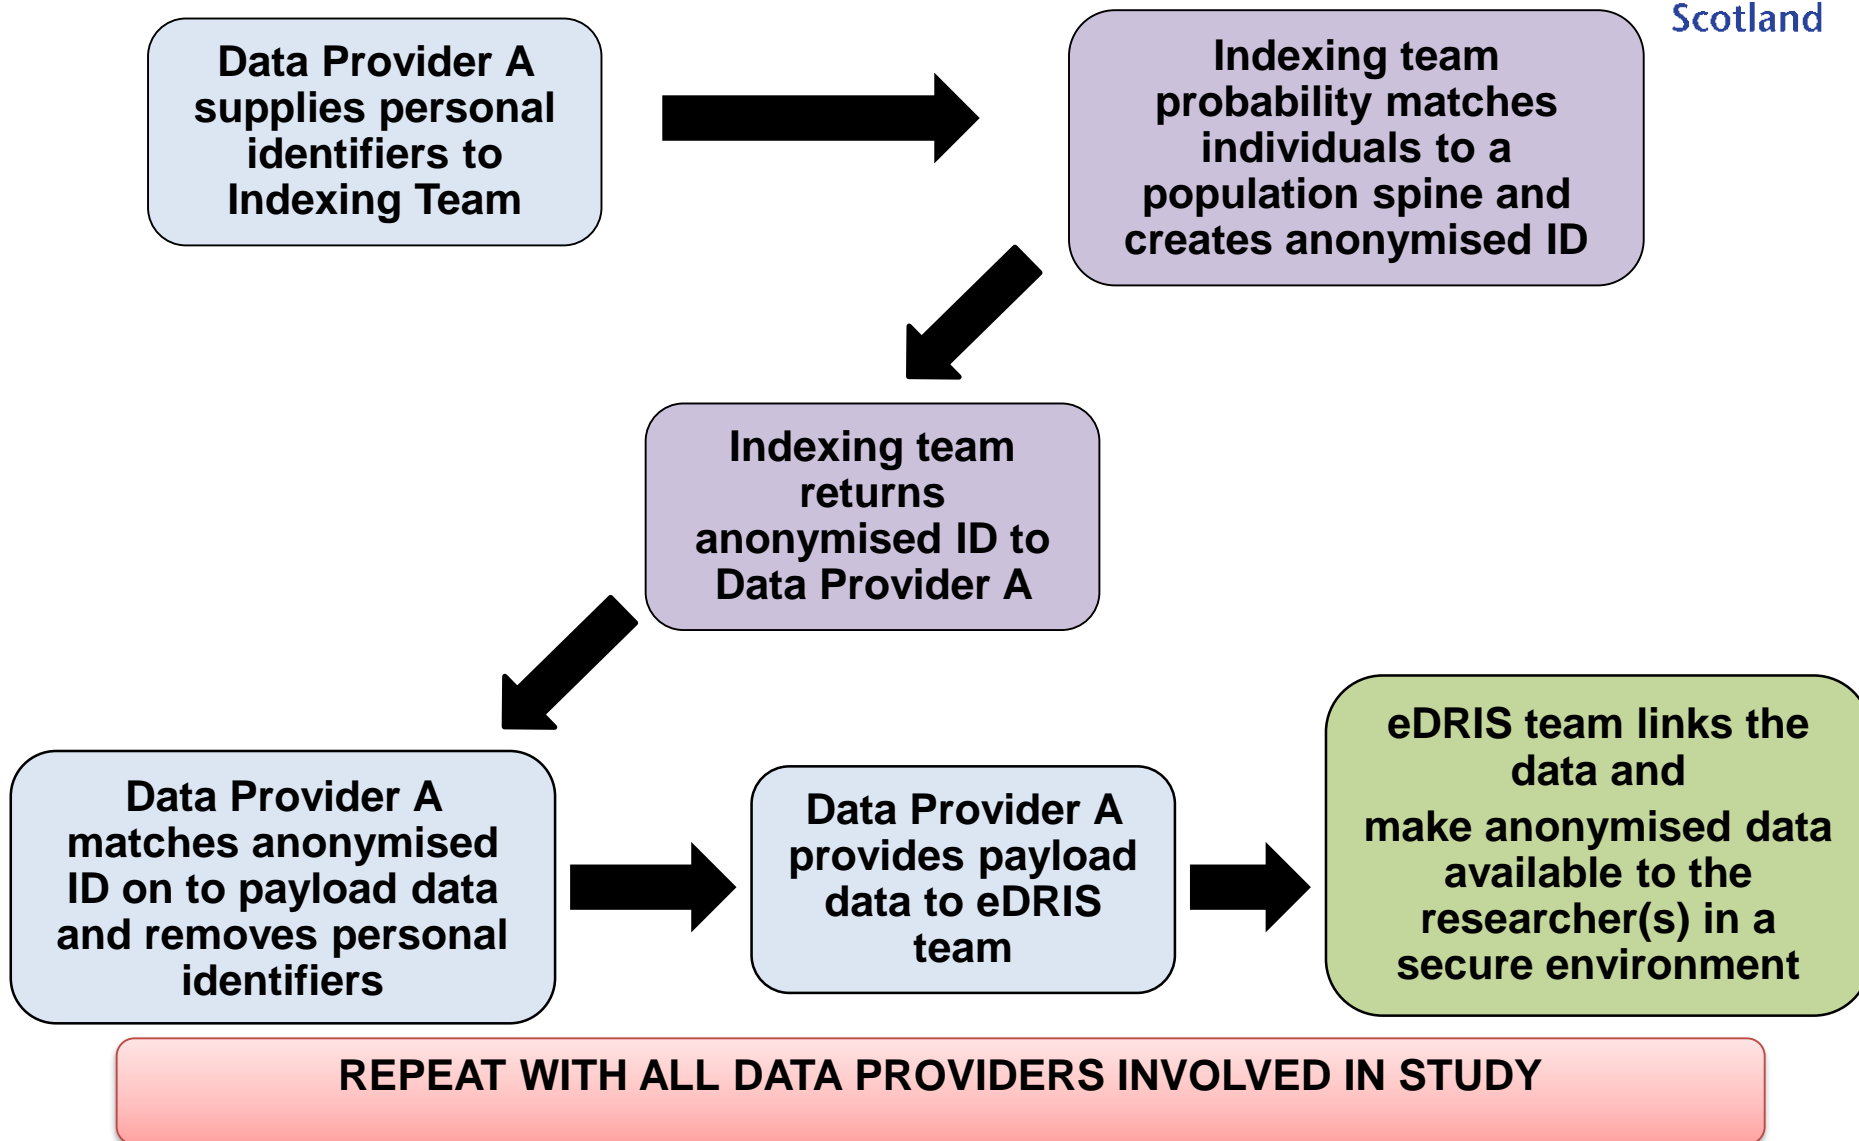

Indexing team send the Master Index File containing a Master Anonymised ID number + Data Provider A ID number + Data Provider B ID number + Data Provider C ID Number (+ ...) to the eDRIS team

eDRIS team run the datasets sent by all data providers and Master Index file through a "linkage agent"

Linkage agent replaces Data Provider ID numbers in each dataset with the Master Anonymised ID number

Researcher receives data files with Master ID plus requested content data in safe haven environment

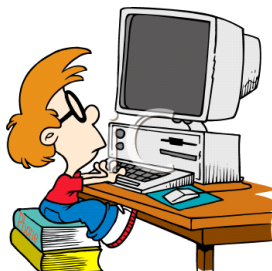

Supplement: MOESM1 [file 26972238]
